# Supplementary material for: The microRNA-29 family in cartilage homeostasis and osteoarthritis
Source: PubMed Central journal article supplement (PMC4856728; doi:10.1007/s00109-015-1374-z), 2015-12-19
Supplement: 109_2015_1374_MOESM1_ESM.pdf [file 109_2015_1374_MOESM1_ESM.pdf]

## **Electronic Supplementary Materials**

J Mol Med 2015

### **The microRNA-29 family in cartilage homeostasis and osteoarthritis**

Linh T T Le, Tracey E Swingler, Natalie Crowe, Tonia L Vincent, Matthew J Barter, Simon T Donell, Anne M Delany, Tamas Dalmay, David A Young, Ian M Clark.

Correspondence to: Ian M Clark, School of Biological Sciences, University of East Anglia, Norwich, UK. [i.clark@uea.ac.uk](mailto:i.clark@uea.ac.uk),

**Supplementary Table 1:** Primer sequences. For subcloning of 3'UTR, restriction sites (bases underlined) were added to the primers: *SacI* (GAGCTC), *SalI* (GTCGAC), *XbaI* (TCTAGA).

| Gene                                 | Forward primer                                                                    | Reverse primer                                                                   | Probe (if applicable)                          |
|--------------------------------------|-----------------------------------------------------------------------------------|----------------------------------------------------------------------------------|------------------------------------------------|
| ADAMTS4                              | 5'-CAAGGTCCCATGTGCAACGT-3'                                                        | 5'-CATCTGCCACCACCAGTGTCT-3'                                                      | 5'- FAM-CCGAAGAGCC AAGCGCTTTG CTTC-TAMRA-3'    |
| MMP3                                 | 5'-TTCCGCCTGTCTCAAGATGATAT-3'                                                     | 5'-AAAGGACAAAGCAGGATCACAGTT-3'                                                   | 5'-FAM-TCAGTCCCTC TATGGACCTC CCCCTGAC-TAMRA-3' |
| SOX9                                 | 5'-TACCCGCACTTGACACAAC-3'                                                         | 5'-TCTCGCTCTCGTTCAGAAGTC-3'                                                      | Probe #61 (Roche Universal probe library)      |
| AXIN2                                | 5'-GCTGACGGATGATTCCATGT-3'                                                        | 5'-ACTGCCACACGATAAAGGAG-3'                                                       | Probe #56 (Roche Universal probe library)      |
| Pri-miR-29a/b1exon 1                 | 5'-TACTGAACTGTCACGGCAGA-3'                                                        | 5'-TGTAGTTAGCGACCTCTGCT-3'                                                       | n/a SYBR green                                 |
| Pri-miR-29a/b1Exon 4                 | 5'-TTGCACCCTCACGACATGCT-3'                                                        | 5'-TGACTCTCAGCAGGCCTCA-3'                                                        | n/a SYBR green                                 |
| Pri-miR-29b2/c exon 1                | 5'-ACTTCTTTAGGGGTGTGCGTA-3'                                                       | 5'-ACCCATCTCCCTAGCATTCT-3'                                                       | n/a SYBR green                                 |
| Pri-miR-29b2/c Exon6                 | 5'-TCAGACTTGCCACCTGGACT-3'                                                        | 5'-AGTTGGCATGAGGCTTCGA-3'                                                        | n/a SYBR green                                 |
| Pre-29a                              | 5'-CTGATTTCTTTGGTGTTCAG-3'                                                        | 5'-AACCGATTTTCAGATGGTGC-3'                                                       | n/a SYBR green                                 |
| Pre-29b1                             | 5'-CATATGGTGGTTTAGATTT-3'                                                         | 5'-AACACTGATTTCAAATGGT-3'                                                        | n/a SYBR green                                 |
| Pre-29b2                             | 5'-GCTGGTTTCACATGGTGGC-3'                                                         | 5'-AACACTGATTTCAAATGGTGC-3'                                                      | n/a SYBR green                                 |
| Pre-29c                              | 5'-CGATTTCTCCTGGTGTTCAG-3'                                                        | 5'-ACCGATTTCAAATGGTGC-3'                                                         | n/a SYBR green                                 |
| ADAMTS6                              | 5'-ACGT <u>GAGCTC</u> TCTCATCGTCATGGTTCTGC-3'                                     | 5'-ACGT <u>GAGCTC</u> CAAGCAGGAGAATGAATGTAGG-3'                                  |                                                |
| ADAMTS6 (1 <sup>st</sup> seed site)  | 5'-TATGTGATGCACTGACATGTAATTTAAGAA GCTTATGATGGAATCAAGTCAAACATGCTG TTTAACTGAAAAG-3' | 5'-CTTTCAGTTAAACAGCATGTTTGACTTGA TTCCATCATAAGCTTCTTAAATTACATGTC AGTGCATCACATA-3' |                                                |
| ADAMTS6 (2 <sup>nd</sup> seed site)  | 5'-TATTTATTTACCAGGGGCACATTAAGCTTA AGTTAACTGTTCTTTGAAAAGGCGCAAGG GAATTCAGT-3'      | 5'-ACTGAATTCCTTGCGCCCTTTCAAAGAA CAGTTAACTTAAGCTTAATGTGCCCTGGT GAAATAAATA-3'      |                                                |
| ADAMTS10                             |                                                                                   |                                                                                  |                                                |
| ADAMTS10 (1 <sup>st</sup> seed site) | 5'-GGGGACACAGACCCGTTTGTAAAGCTTACC CTTGTGCATGGTGTGCG-3'                            | 5'-CGCACACCATCGACAAGGGGTAAGCTTA CAAACGGGTCTGTGTCCCC-3'                           |                                                |
| ADAMTS10 (2 <sup>nd</sup> seed site) | 5'-GCTCGGTCCGGCCAAGCTTATGACGATG AGAGATGCATTAATCGGTCC-3'                           | 5'-GGACCGATTAATGCATCTCTCATCGTCAT AAGCTTGGCCCGGACCGAGC-3'                         |                                                |

|                                            |                                                                                                        |                                                                                                       |
|--------------------------------------------|--------------------------------------------------------------------------------------------------------|-------------------------------------------------------------------------------------------------------|
| ADAMTS14                                   | 5'-ACTG <u>GAGCTC</u> GCTGTGCCCTGCCATC-3'                                                              | 5'-<br>ACTG <u>GAGCTC</u> GGGTCCAATGGCGATGTT<br>A-3'                                                  |
| ADAMTS14<br>(1 <sup>st</sup> seed<br>site) | 5'-<br>GTTTGTCTTTGCTGGCCAGAAGAGTCGAC<br>TCATGGCCATACTCTGGCCTTG-3'                                      | 5'-<br>CAAGGCCAGAGTATGGCCATGAGTCGAC<br>TCTTCTGGCCAGCAAAGAC-3'                                         |
| ADAMTS14<br>(2 <sup>nd</sup> seed<br>site) | 5'-<br>GGGTGCCAGCCCCTGGCCGTCGACTGGA<br>GTGGGGAAGACAC-3'                                                | 5'-<br>GTGTCTTCCCCACTCCAGTCGACGGCCA<br>GGGGCTGGCACCC-3'                                               |
| ADAMTS14<br>(3 <sup>rd</sup> seed<br>site) | 5'-<br>CTAAACTCCTGCCAGGTGATAGAGAGCTC<br>TCTCACTTCTTCTTCCCCAAGGC-3'                                     | 5'-<br>GCCTTGGGGAAGGAAGAAGTGAGAGAG<br>CTCTCTATCACCTGGCAGGAGTTTAG-3'                                   |
| ADAMTS14<br>(4 <sup>th</sup> seed<br>site) | 5'-<br>CTAAACTCCTGCCAGGTGATAGAGAGCTC<br>TCTCACTTCTTCTTCCCCAAGGC-3'                                     | 5'-<br>GCCTTGGGGAAGGAAGAAGTGAGAGAG<br>CTCTCTATCACCTGGCAGGAGTTTAG-3'                                   |
| ADAMTS17                                   | 5'-<br>ACGTT <u>CTAG</u> AAACATGAGCGTGGACTTGG-<br>3'                                                   | 5'-<br>ACGTT <u>CTAG</u> ATGTAATGCAAGTTAACGAA<br>TGG-3'                                               |
| ADAMTS17<br>(1 <sup>st</sup> seed<br>site) | 5'-<br>GCAATTACCGTTTCTTATGTCACAGTCGAC<br>TGAAGAGAGGCCCTTCTGTTTCCC-3'                                   | 5'-<br>GGGAAACAGAAGGGCCTCTTTCAGTCG<br>ACTGTGACATAAGAAACGGTAATTGC-3'                                   |
| ADAMTS17<br>(2 <sup>nd</sup> seed<br>site) | 5'-<br>CACCAACTTGGTGGGCATTTTCATGTCGAC<br>TTATGTTCTAGGACTTTACCGTA-3'                                    | 5'-<br>TACGGTAAAGTCCTAGAACATAAGTCGA<br>CATGAAATGCCACCAAGTTGGTG-3'                                     |
| ADAMTS17<br>(3 <sup>rd</sup> seed<br>site) | 5'-<br>TAACAAAACAAAACACAGAAACACAGTCGA<br>CATAAATCAAGAAGCACAGGGAGATGATC<br>CCATGG-3'                    | 5'-<br>CCATGGGATCATCTCCCTGTGCTTCTTGA<br>TTTATGTCGACTGTGTTTCTGTGTTTTGTT<br>TTGTTA-3'                   |
| ADAMTS17<br>(4 <sup>th</sup> seed<br>site) | 5'-<br>GAAGTGTTGAGAAACTTCCGTGTCGACTC<br>TGTGGAAAGAACCGAGGGT-3'                                         | 5'-<br>ACCCTCGTTCCTTCCACAGAGTCGACA<br>CGGAAGTTTCTCAACACTTC-3'                                         |
| ADAMTS17<br>(5 <sup>th</sup> seed<br>site) | 5'-<br>CCAGAGTCTCACGACCCTACGGTCGCCTT<br>TTTATTGGTGAAAATTAACC-3'                                        | 5'-<br>GGTTTAATTTTGCACCAATAAAAAGGCGA<br>CCGTAGGGTCGTGAGACTCTGG-3'                                     |
| ADAMTS19                                   | 5'-<br>ACGT <u>GAGCTC</u> AATCACAGCTCCAGGTAAT<br>C-3'                                                  | 5'-<br>ACGT <u>GAGCTC</u> CCAAGAGACATACTATCTT<br>CCAAGG-3'                                            |
| ADAMTS19<br>(1 <sup>st</sup> seed<br>site) | 5'-<br>ATCAAATTAATTTATTTTTTGCCTGCCAAA<br>CATCCAATGGTCGACTTGTGTTGGTTACAC<br>AAACATTTTGATTTATACTATATG-3' | 5'-<br>CATATAGTATAAATCAAATGTTTGTGTAA<br>CCAAAACAAGTCGACCATTGGATGTTTG<br>GCAGGCAAAAAATAAATTAATTTGAT-3' |
| ADAMTS19<br>(2 <sup>nd</sup> seed<br>site) | 5'-<br>GTTGTTTGTAGGGCTATCTCTAAGTCGAC<br>CCTCTCTCCCCACCAATAACATTGAATTAT<br>C-3'                         | 5'-<br>ATAATTCAATGTTATTGGTGGGGAGAGA<br>GGGTGACTTAGAGATAGCCCTAACAAA<br>CAACG-3'                        |
| FZD3                                       | 5'-<br>ATGCGT <u>CGACT</u> ATTAGATGCCAGCCTTTC<br>TC-3'                                                 | 5'-<br>ATGCGT <u>CGACT</u> ATGCCTACCAAGAGGATA<br>ACATTC-3'                                            |
| FZD3 (1 <sup>st</sup><br>seed site)        | 5'-<br>GGATTTAGTCTAACTCACAGCTAAGGTAGA<br>AAAGTACTCTGATGGCAAGAGAATGTCCA<br>GACTAATATTTTC-3'             | 5'-<br>GAAAATATTAGTCTGGACATTCTCTTGCC<br>ATCAGAGTACTTTTCTACCTTAGCTGTGA<br>GTTAGACTAAATCC-3'            |

|                                      |                                                                                    |                                                                                     |
|--------------------------------------|------------------------------------------------------------------------------------|-------------------------------------------------------------------------------------|
| FZD5                                 | 5'-<br>ATGCGT <u>TCGAC</u> CGGCATCGGCTACAACCTGA<br>C-3'                            | 5'-<br>ATGCGT <u>TCGAC</u> AGACCACACAGTTCAAAG<br>A AACCTG-3'                        |
| FZD5 (1 <sup>st</sup><br>seed site)  | 5'-<br>CGGCGTCGCGGCCCAAGCTTGGGAGGCG<br>GTCGCAG-3'                                  | 5'-<br>CTGCGACCGCCTCCCAAGCTTGGGCCG<br>CGACGCCG-3'                                   |
| FZD5 (2 <sup>nd</sup><br>seed site)  | 5'-<br>GTGGACGTGGAGATGAAGCACAAAGCTTGA<br>CCACAGGCCTATCCAGAAGG-3'                   | 5'-<br>CCTTCTGGATAGGCCTGTGGTCAAGCTT<br>GTGTTTCATCTCCACGTCCAC-3'                     |
| FZD5 (3 <sup>rd</sup><br>seed site)  | 5'-<br>GCCACCAGCAGGTAGAAGCTTAGCGGG<br>CCCAGCACGAAGCC-3'                            | 5'-<br>GGCTTCGTGCTGGGCCCGCTAAGCTTCT<br>ACCTGCTGGTGGGC-3'                            |
| FZD5 (4 <sup>th</sup><br>seed site)  | 5'-<br>CACATGAAGTACTTGAGCATGAAGCTTCA<br>GTACTCGGGCTTGCGCGCG-3'                     | 5'-<br>CGCGCGCCAAGCCCGAGTACTGAAGCTT<br>CATGCTCAAGTACTTCATGTG-3'                     |
| FZD5 (5 <sup>th</sup><br>seed site)  | 5'-<br>CGGGAGGGGGCAACAAGCTTATGAAGGTA<br>AACGGAAGTGACCTTGGA-3'                      | 5'-<br>TGCCAAGGTCACTTCCGTTTACCTTCATA<br>AGCTTGTTGCCCCCTCCCG-3'                      |
| FRAT2                                | 5'-<br>ATGCGT <u>TCGAC</u> CAACAGCGTCCAGTTCCTA<br>C-3'                             | 5'-<br>ATGCGT <u>TCGAC</u> GCCGTCAGTTTCATACA<br>GC-3'                               |
| FRAT2 (1 <sup>st</sup><br>seed site) | 5'-<br>GCGTGGAGAAATGTATGCGCCAGAAGCTT<br>TCCGTGGGGCATGAGAATTTCC-3'                  | 5'-<br>GGAAATTCATGCCCCACGAAAGCTT<br>CTGGCGCATACATTTCTCCACGC-3'                      |
| FRAT2 (2 <sup>nd</sup><br>seed site) | 5'-<br>CTTATTTTCTGGTGGAGGAGCTTAGTAAGT<br>AAGCTTACAATTGCTGTGCAAAGAAATTC<br>AGAGG-3' | 5'-<br>CCTCTGGAATTTCTTTGCACAGCAATTGT<br>AAGCTTACTTACTAAGCTCCTCCACCAGA<br>AAATAAG-3' |
| FRAT2 (3 <sup>rd</sup><br>seed site) | 5'-<br>GGGAGACTCCAAGCGGTGGTAAAAGCTTA<br>ACAGGGCTCTTCTTGAGCAAG-3'                   | 5'-<br>CTTGCTCCAAGAAGAGCCCTGTTAAGCT<br>TTTACCACCGCTTGGAGTCTCC-3'                    |
| CK2A2                                | 5'-<br>ATGCGT <u>TCGAC</u> ATGCAGTACTAGAGTTGT<br>GTGG-3'                           | 5'-<br>ATGCGT <u>TCGAC</u> AATAAGTTTGCTTGTCT<br>GTGG-3'                             |
| CK2A2 (1 <sup>st</sup><br>seed site) | 5'-<br>AGAGGAATATACAAGGGGCTTGGGGAAGA<br>AAATAAGCTTCCCGGAGCAAGTGTG-3'               | 5'-<br>CAACTTGTCTCCGGAAGCTTATTTTCT<br>TCCCAAGCCCTTGTATATCTCT-3'                     |
| CK2A2 (2 <sup>nd</sup><br>seed site) | 5'-<br>TTCCTCTAATCTATCAGTCTGAGAAGCTT<br>TTCTCTCTGCAAGGGAACACATTTGC                 | 5'-<br>GCAAATGTGTTCCCTTGCAGAGAGGAAA<br>AGCTTCTCAGACTGATAGATTAGAGGAG<br>A            |
| CK2A2 (3 <sup>rd</sup><br>seed site) | 5'-<br>GCGCTGACTCGAGAAGCTTACCTTTAG<br>TCCACTGGGACCAATCCA-3'                        | 5'-<br>TGGATTGGTCCCAGTGGACTGAAAGGTA<br>AGCTTCTCGAGTCAGGCGC-3'                       |
| CK2A2 (4 <sup>th</sup><br>seed site) | 5'-<br>CTGCTTCCATCCTTATCAACAGAAGCTTTG<br>GGAGAACCTAAGTATTTCCCTGAG-3'               | 5'-<br>TCAGGAAATGACTTAGGTTCTCCCAA<br>GCTTCTGTTGATAAGGATGGAAGCAG-3'                  |
| DVL3                                 | 5'-<br>ATGCGT <u>TCGAC</u> GCTGCGTTCCTCTCTCCAT<br>C-3'                             | 5'-<br>ATGCGT <u>TCGACT</u> ACCATTTATTGAGCACCT<br>ACTTACTGTG-3'                     |
| DVL3 (1 <sup>st</sup><br>seed site)  | 5'-<br>GTGCGCTAACTGCTCGCAGAAGCTTGCGA<br>GGGTGGGGTGCACC-3'                          | 5'-<br>GGTGCACCCACCCTCGCAAGCTTCTGC<br>GAGCAGTTAGCGCAC-3'                            |

|                                     |                                                                     |                                                                     |
|-------------------------------------|---------------------------------------------------------------------|---------------------------------------------------------------------|
| DVL3 (2 <sup>nd</sup><br>seed site) | 5'-<br>CCCTTTTGTCTCTGGGACCAGACTTGTTAA<br>GCTTACCCCTTACTCCCCTCTGC-3' | 5'-<br>GCAGAGGGGAGTAAGGGGTAAGCTTAAC<br>AAGTCTGGTCCCAGAGACAAAAGGG-3' |
| DVL3 (3 <sup>rd</sup><br>seed site) | 5'-<br>GCACAGTGCCTGGCACACAGTAGAGTAA<br>GCTTCAATAAATGGTAGTCGACC-3'   | 5'-<br>GGTCGACTACCATTTATTGAAGCTTACT<br>CTACTGTGTGCCAGGCACTGTGC-3'   |

**Supplementary Table 2:** MicroRNAs regulated in the DMM model (operated right knee compared to un-operated left knee) at 1, 3 and 7 days post-surgery with a fold change greater than 1.5 (higher or lower). Down-regulated microRNAs are represented as negative fold change.

|          | miRNA       | Fold change |
|----------|-------------|-------------|
| Day 1    | miR-144-3p  | 1.7         |
|          | miR-29b-3p  | 1.5         |
| Day 3    | miR-370-5p  | 1.7         |
|          | miR-21-5p   | 1.6         |
| Day 7    | miR-379-5p  | 2.6         |
|          | miR-127-3p  | 2.4         |
|          | miR-335-5p  | 2.4         |
|          | miR-370-5p  | 2.2         |
|          | miR-214-3p  | 2.2         |
|          | miR-21-5p   | 2.1         |
|          | miR-3073-3p | 2           |
|          | miR-199a-3p | 1.9         |
|          | miR-214-5p  | 1.8         |
|          | miR-210-3p  | 1.8         |
|          | miR-455-3p  | 1.8         |
|          | miR-199a-5p | 1.7         |
|          | miR-2137    | 1.7         |
|          | miR-199b-5p | 1.7         |
|          | miR-136-5p  | 1.7         |
|          | miR-34a-5p  | 1.6         |
|          | miR-99b-5p  | 1.6         |
|          | miR-152-3p  | 1.5         |
|          | miR-34c-5p  | 1.5         |
|          | miR-144-3p  | -1.5        |
|          | miR-3100-3p | -1.5        |
|          | miR-669c-3p | -1.6        |
|          | miR-378-3p  | -1.6        |
|          | miR-3473b   | -1.6        |
|          | miR-133a-5p | -1.6        |
|          | miR-3474    | -1.7        |
|          | miR-378b    | -1.7        |
|          | miR-133a-3p | -1.8        |
|          | miR-133b-3p | -1.8        |
|          | miR-1952    | -1.9        |
|          | miR-491-3p  | -1.9        |
|          | miR-1a-3p   | -2.2        |
| miR-706  | -2.3        |             |
| miR-3572 | -2.3        |             |

**Supplementary Table 3:** Candidate target genes of miR-29b which increase in expression when treated with microRNA inhibitor and decrease in expression with microRNA mimic

| Gene     | Mimic<br>(fold change down) | Inhibitor<br>(fold change up) | miR-29 target sites |      |      |
|----------|-----------------------------|-------------------------------|---------------------|------|------|
|          |                             |                               | 6mer                | 7mer | 8mer |
| COL1A1   | 2.53                        | 1.69                          | 3                   | 3    | 1    |
| C7orf41  | 2.33                        | 1.21                          | 2                   | 1    | 0    |
| PXDN     | 2.23                        | 1.37                          | 2                   | 2    | 1    |
| COL5A2   | 2.20                        | 1.27                          | 2                   | 2    | 1    |
| SH3PXD2A | 2.16                        | 1.15                          | 4                   | 3    | 1    |
| GGCT     | 1.90                        | 1.20                          | 1                   | 1    | 0    |
| PSAT1    | 1.83                        | 1.28                          | 1                   | 0    | 0    |
| COL11A1  | 1.80                        | 1.25                          | 2                   | 2    | 0    |
| COL15A1  | 1.73                        | 1.22                          | 2                   | 1    | 1    |
| NDUFA10  | 1.71                        | 1.33                          | 2                   | 1    | 0    |
| H19      | 1.68                        | 1.16                          | 2                   | 1    | 1    |
| TP53INP1 | 1.68                        | 1.38                          | 1                   | 1    | 1    |
| ADAM19   | 1.64                        | 1.28                          | 6                   | 2    | 0    |
| MFAP2    | 1.59                        | 1.24                          | 2                   | 2    | 0    |
| P2RY6    | 1.58                        | 1.26                          | 1                   | 0    | 0    |
| WISP2    | 1.58                        | 1.21                          | 1                   | 0    | 0    |
| SPNS1    | 1.56                        | 1.20                          | 1                   | 1    | 0    |
| CCND2    | 1.52                        | 1.20                          | 2                   | 2    | 0    |
| VAMP7    | 1.47                        | 1.16                          | 2                   | 1    | 0    |
| PRMT6    | 1.45                        | 1.18                          | 1                   | 1    | 0    |
| KLHL24   | 1.45                        | 1.21                          | 2                   | 1    | 0    |
| SLC2A3   | 1.43                        | 1.27                          | 1                   | 1    | 0    |
| S100A16  | 1.43                        | 1.18                          | 2                   | 2    | 0    |
| EIF4E2   | 1.43                        | 1.15                          | 1                   | 1    | 1    |
| MEF2D    | 1.43                        | 1.19                          | 3                   | 0    | 0    |
| CDKN1A   | 1.43                        | 1.15                          | 1                   | 0    | 0    |
| FSTL1    | 1.41                        | 1.24                          | 2                   | 1    | 0    |
| C10orf54 | 1.41                        | 1.17                          | 6                   | 2    | 0    |
| PPIC     | 1.40                        | 1.29                          | 2                   | 1    | 1    |
| TOMM20   | 1.40                        | 1.19                          | 2                   | 2    | 0    |
| SPARC    | 1.39                        | 1.15                          | 3                   | 2    | 0    |
| TSPAN9   | 1.39                        | 1.18                          | 4                   | 1    | 0    |
| CADM1    | 1.38                        | 1.29                          | 1                   | 1    | 0    |
| GPX7     | 1.38                        | 1.29                          | 1                   | 0    | 0    |
| DYM      | 1.38                        | 1.19                          | 1                   | 1    | 1    |
| COL3A1   | 1.36                        | 1.26                          | 3                   | 2    | 2    |
| C5orf33  | 1.34                        | 1.15                          | 2                   | 1    | 0    |
| RNF144A  | 1.34                        | 1.16                          | 3                   | 1    | 0    |
| KLHDC3   | 1.33                        | 1.31                          | 1                   | 1    | 0    |
| SMS      | 1.33                        | 1.19                          | 1                   | 1    | 0    |

|           |      |      |   |   |   |
|-----------|------|------|---|---|---|
| COMMD2    | 1.32 | 1.20 | 2 | 1 | 1 |
| ARHGAP28  | 1.32 | 1.24 | 1 | 0 | 0 |
| LEPREL4   | 1.31 | 1.17 | 2 | 0 | 0 |
| MGAT4B    | 1.30 | 1.26 | 1 | 1 | 0 |
| EML4      | 1.30 | 1.21 | 2 | 1 | 0 |
| SLC25A13  | 1.28 | 1.35 | 1 | 1 | 0 |
| DIXDC1    | 1.28 | 1.16 | 2 | 1 | 0 |
| JMY       | 1.27 | 1.19 | 3 | 1 | 0 |
| PLEKHA1   | 1.27 | 1.33 | 1 | 1 | 0 |
| PPP1R14C  | 1.27 | 1.22 | 2 | 0 | 0 |
| PTGFR     | 1.26 | 1.21 | 1 | 0 | 0 |
| PTGFR     | 1.26 | 1.18 | 1 | 0 | 0 |
| TRIB3     | 1.26 | 1.40 | 3 | 1 | 0 |
| GEMIN2    | 1.26 | 1.18 | 1 | 1 | 0 |
| LAMC1     | 1.26 | 1.31 | 1 | 1 | 1 |
| NPC1      | 1.25 | 1.20 | 1 | 0 | 0 |
| SIRT1     | 1.25 | 1.18 | 1 | 1 | 1 |
| AHNAK     | 1.25 | 1.26 | 1 | 1 | 0 |
| WIPI1     | 1.24 | 1.16 | 1 | 0 | 0 |
| VPS25     | 1.23 | 1.16 | 1 | 1 | 0 |
| CREG1     | 1.23 | 1.19 | 2 | 2 | 0 |
| SESTD1    | 1.22 | 1.33 | 2 | 2 | 2 |
| AP3M2     | 1.22 | 1.17 | 1 | 1 | 0 |
| COL4A1    | 1.22 | 1.41 | 2 | 2 | 1 |
| TMEM176A  | 1.22 | 1.19 | 1 | 1 | 0 |
| SUV420H1  | 1.22 | 1.19 | 1 | 1 | 0 |
| LOC653994 | 1.22 | 1.17 | 3 | 2 | 0 |
| AZIN1     | 1.22 | 1.39 | 1 | 0 | 0 |
| PTDSS2    | 1.22 | 1.15 | 1 | 0 | 0 |
| NNAT      | 1.22 | 1.16 | 1 | 0 | 0 |
| CBX6      | 1.22 | 1.16 | 3 | 3 | 0 |
| KDM5B     | 1.22 | 1.38 | 2 | 1 | 0 |
| MAPK6     | 1.21 | 1.15 | 1 | 0 | 0 |
| SGK1      | 1.21 | 1.20 | 1 | 1 | 1 |
